# Supplementary material
Source: PubMed Central journal article supplement (PMC4785885)

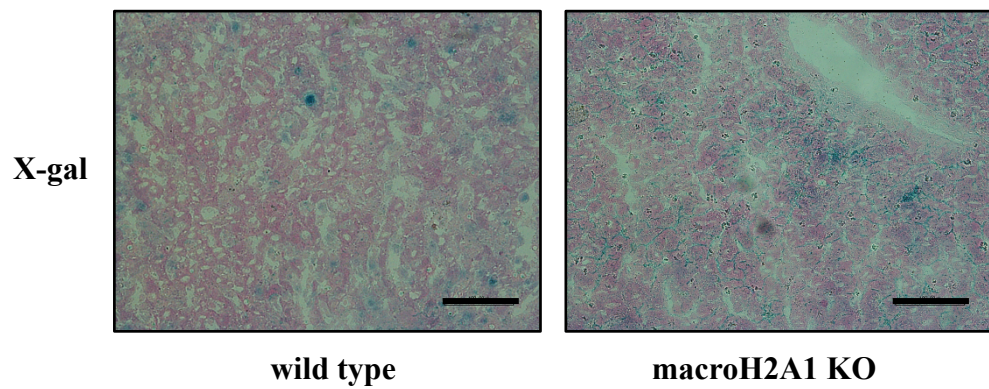

C

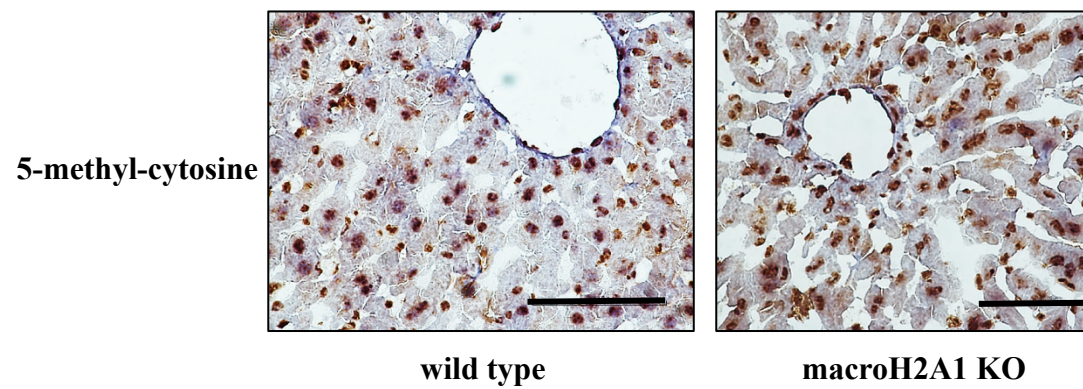

D

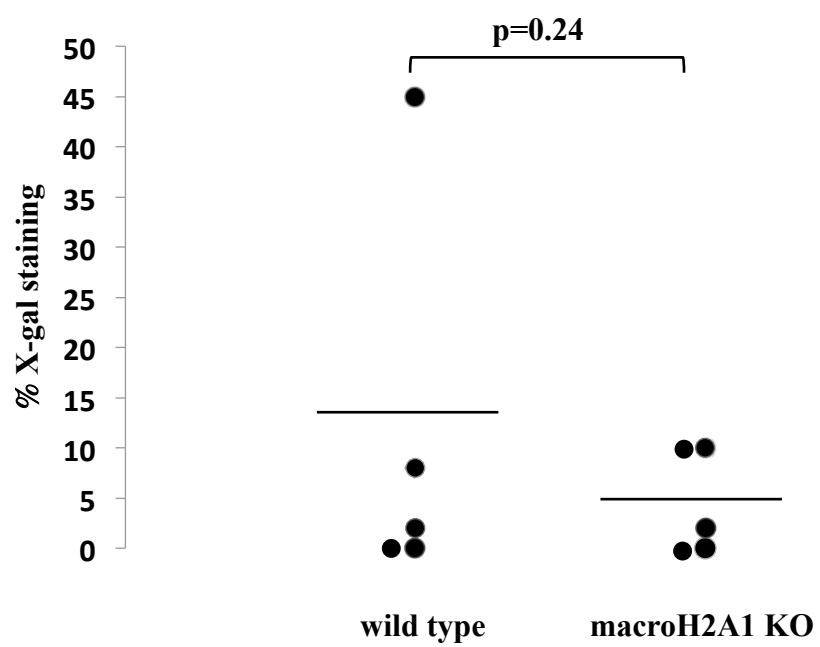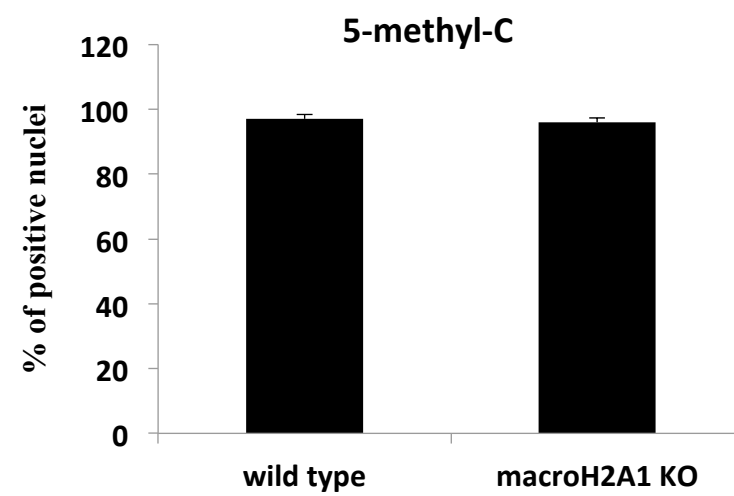

Supplement: NIHMS764409-supplement-Supplemental_Figure_1.pdf [file NIHMS764409-supplement-Supplemental_Figure_1.pdf]

**Figure S10**

**A**

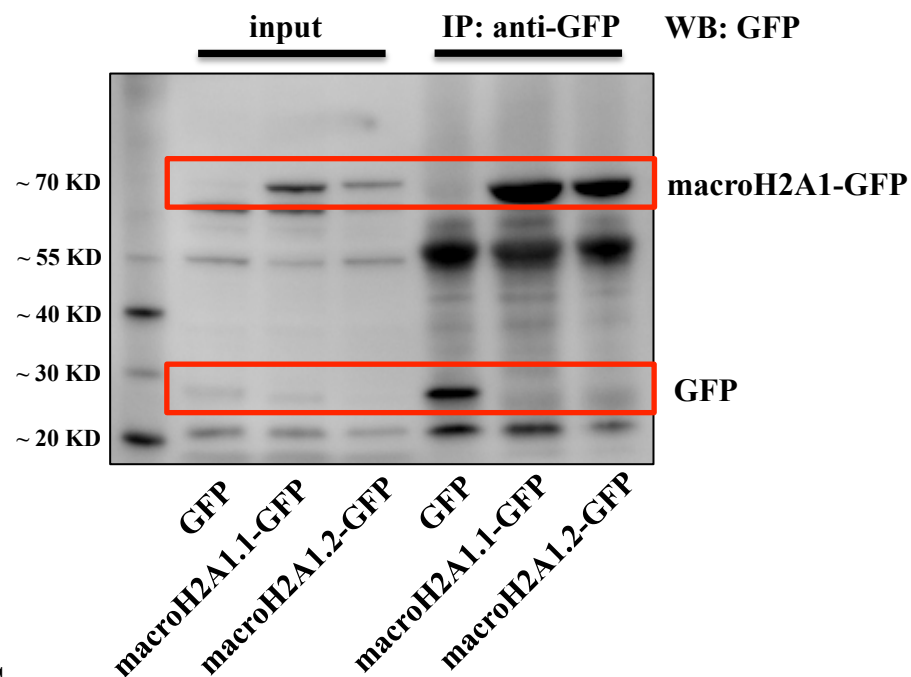

**B**

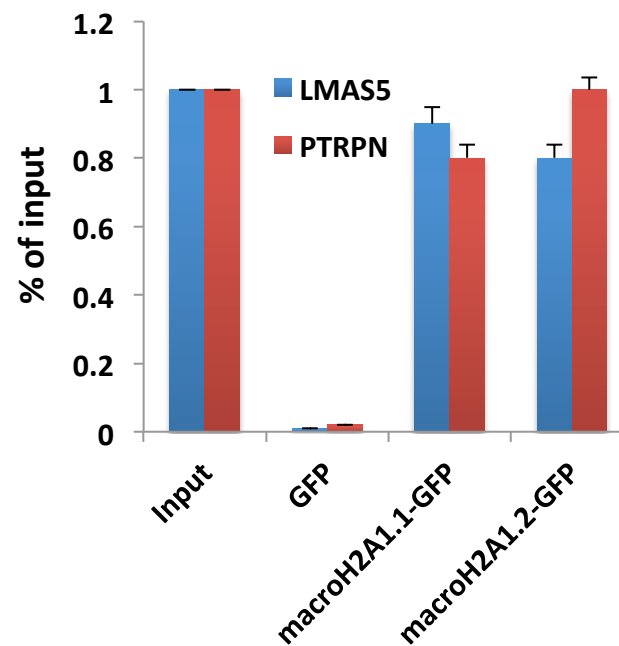

**C**

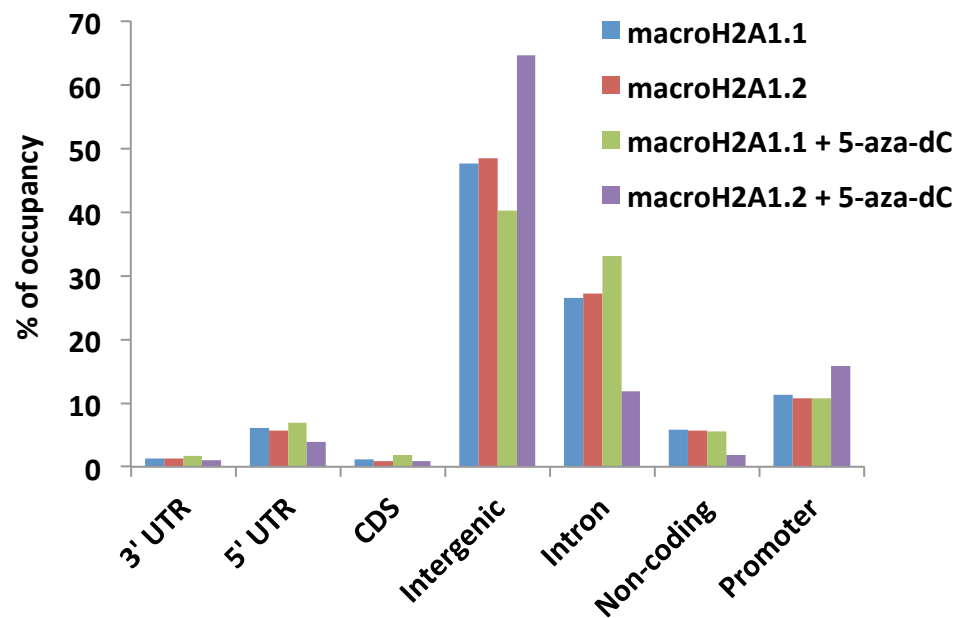

Supplement: NIHMS764409-supplement-Supplemental_Figure_10.pdf [file NIHMS764409-supplement-Supplemental_Figure_10.pdf]

Figure S2

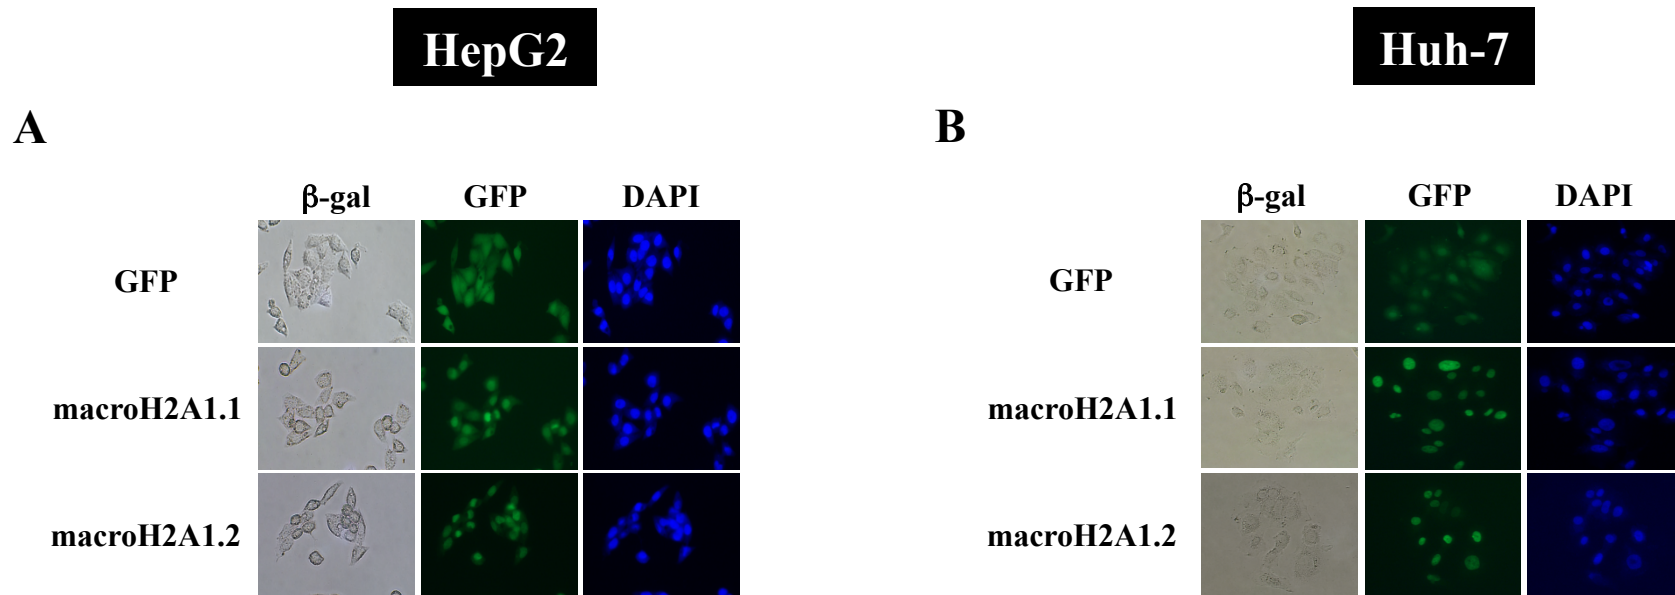

Supplement: NIHMS764409-supplement-Supplemental_Figure_2.pdf [file NIHMS764409-supplement-Supplemental_Figure_2.pdf]

Figure S3

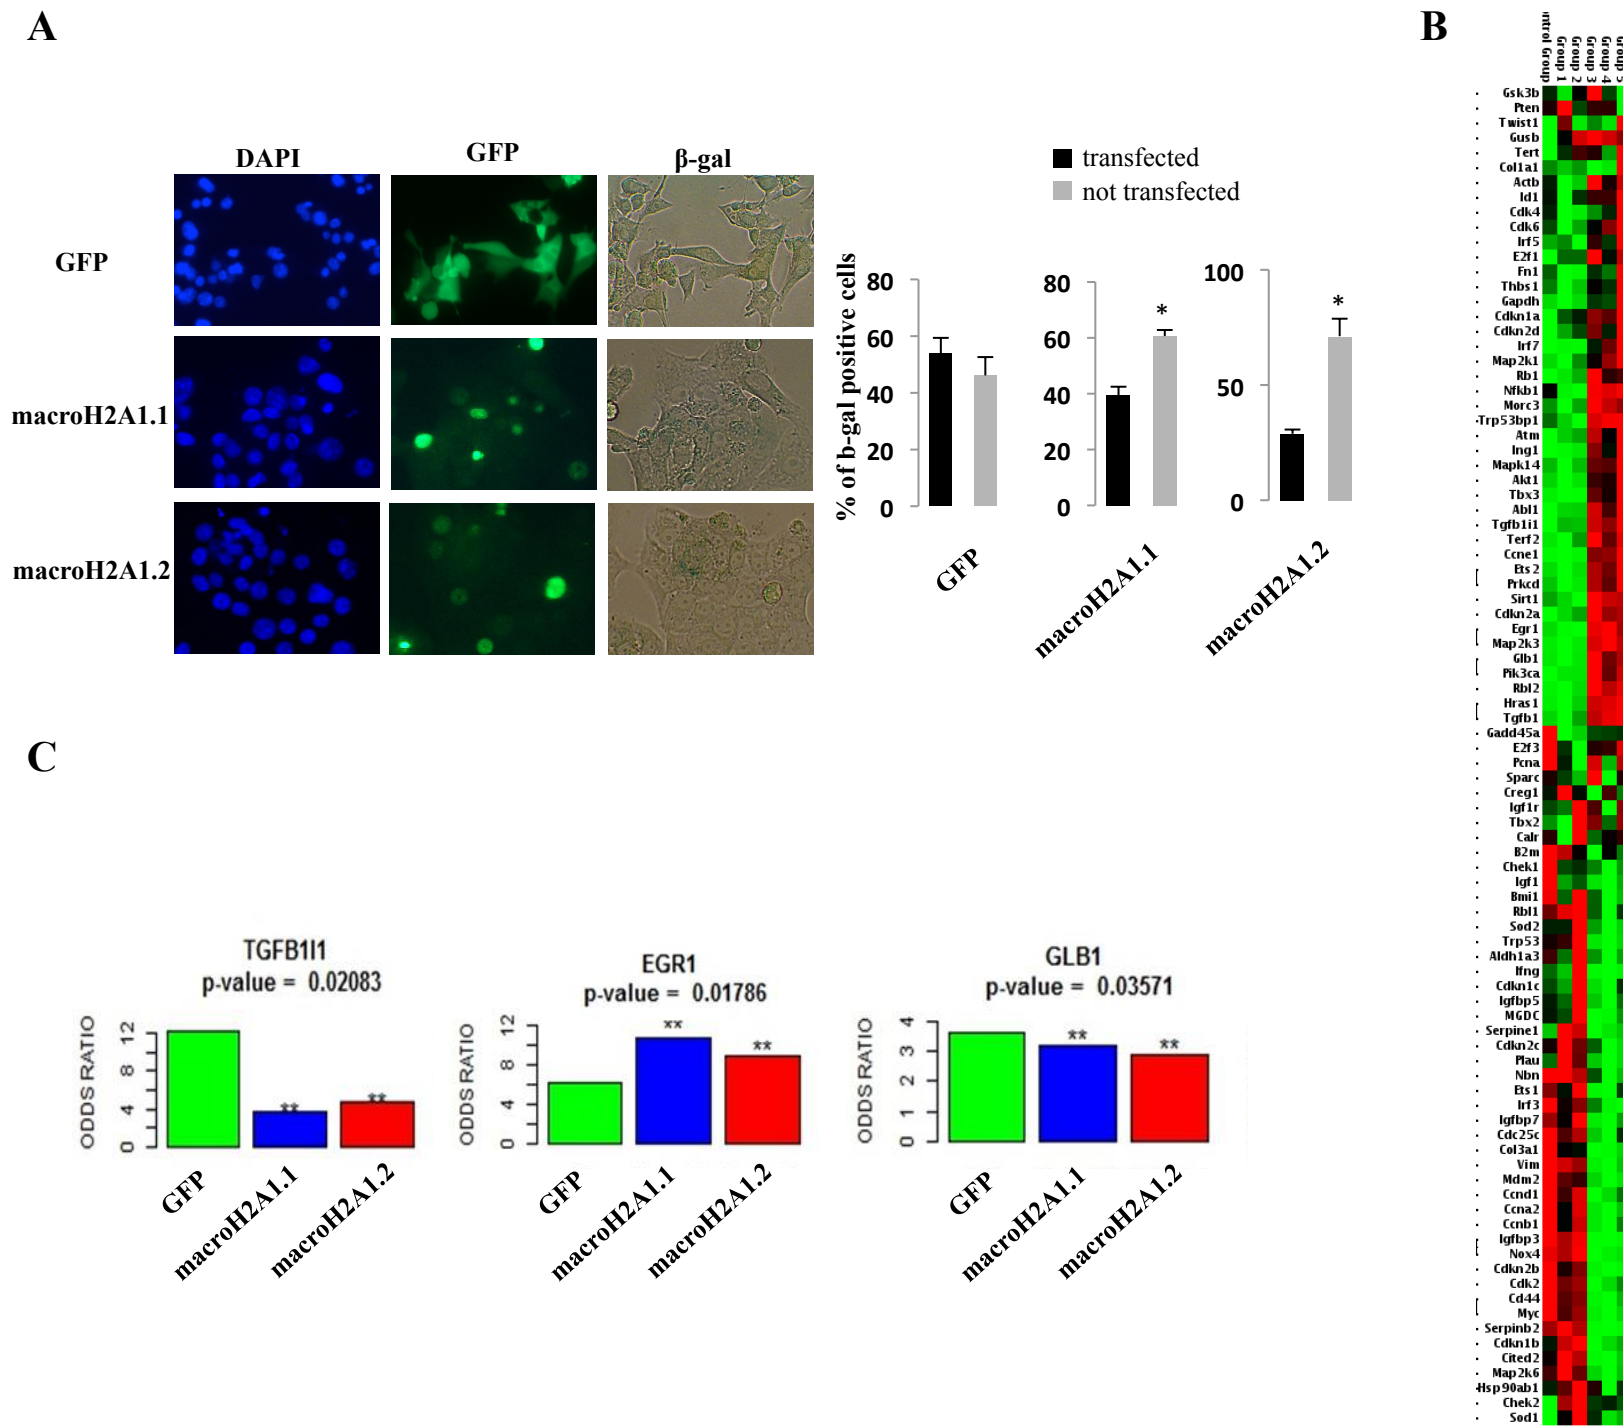

Supplement: NIHMS764409-supplement-Supplemental_Figure_3.pdf [file NIHMS764409-supplement-Supplemental_Figure_3.pdf]

Figure S4

A

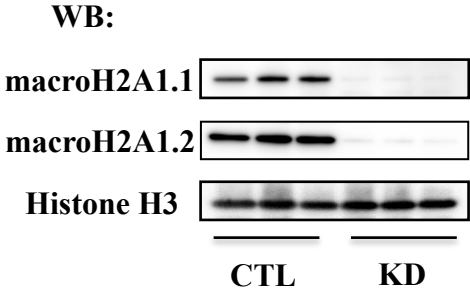

B

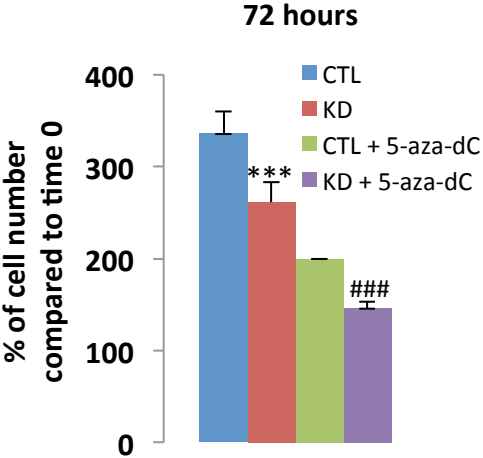

C

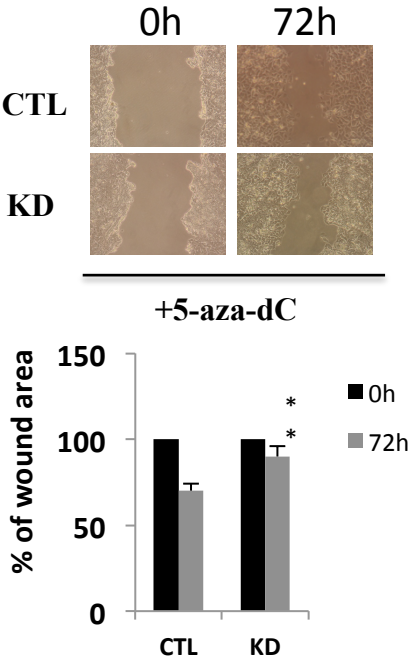

D

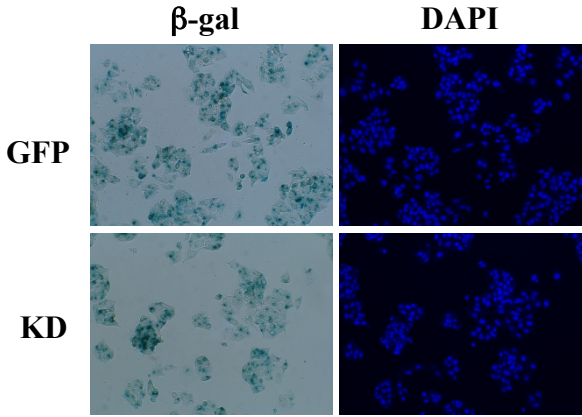

Supplement: NIHMS764409-supplement-Supplemental_Figure_4.pdf [file NIHMS764409-supplement-Supplemental_Figure_4.pdf]

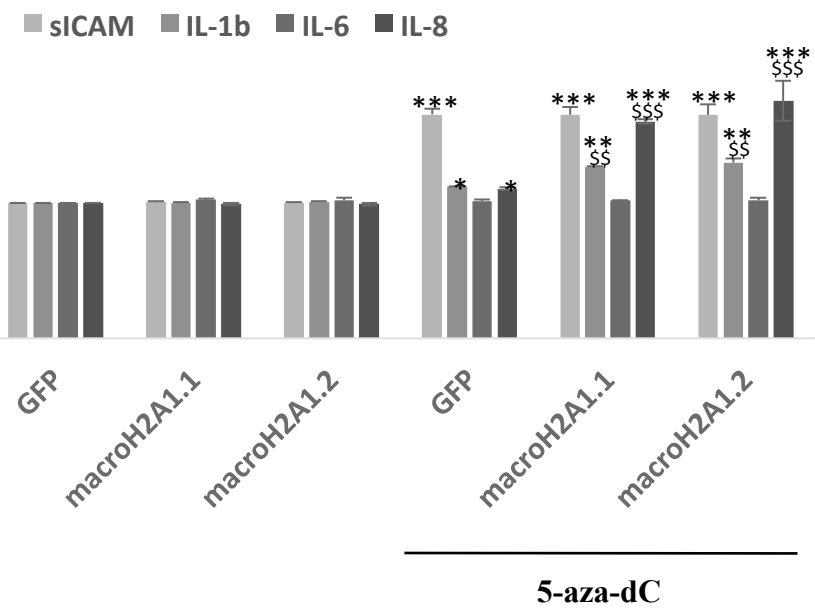

**B**

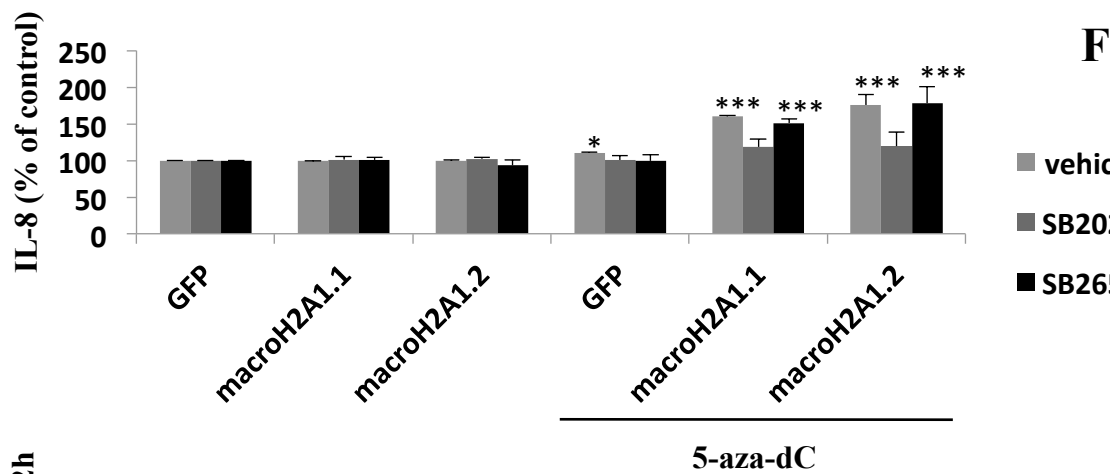

**C**

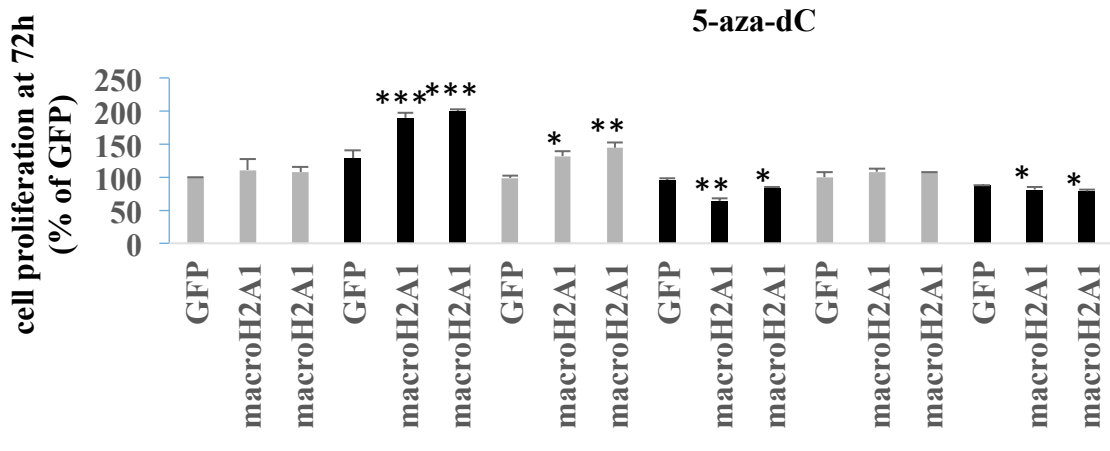

**E**

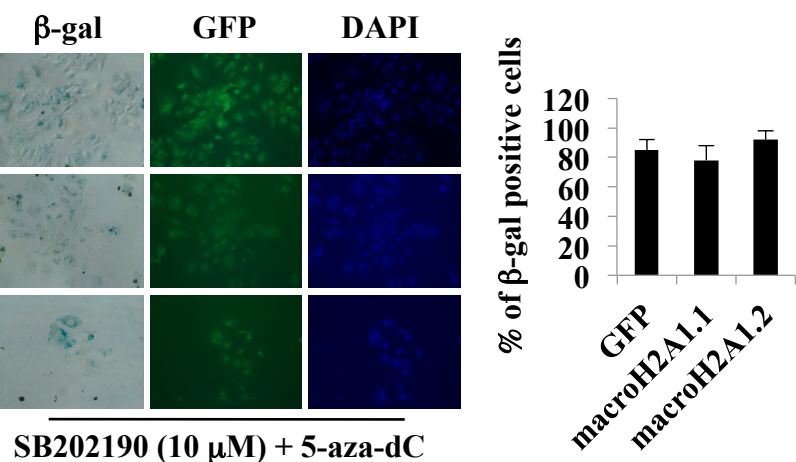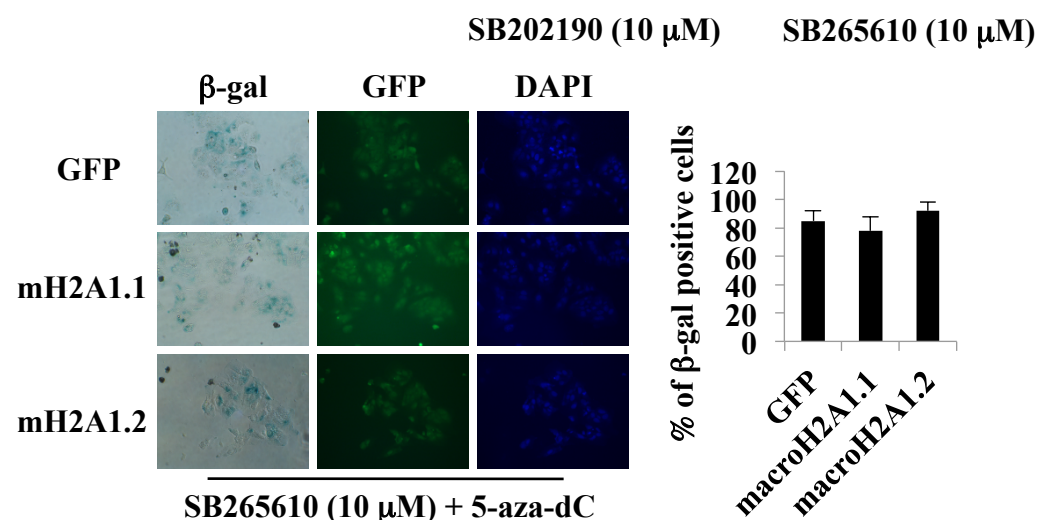

Supplement: NIHMS764409-supplement-Supplemental_Figure_5.pdf [file NIHMS764409-supplement-Supplemental_Figure_5.pdf]

**Figure S6**

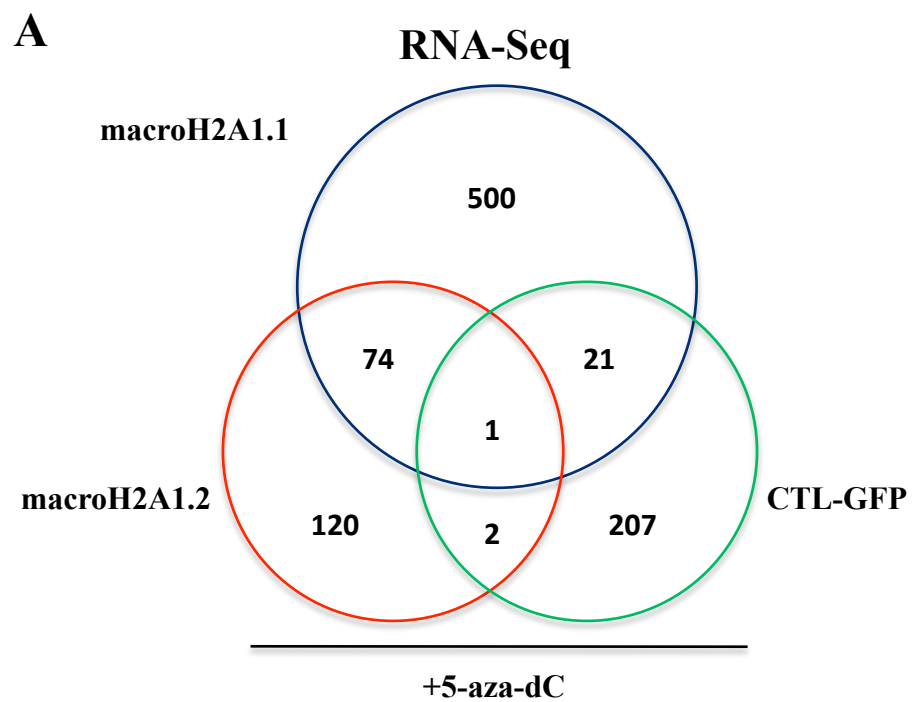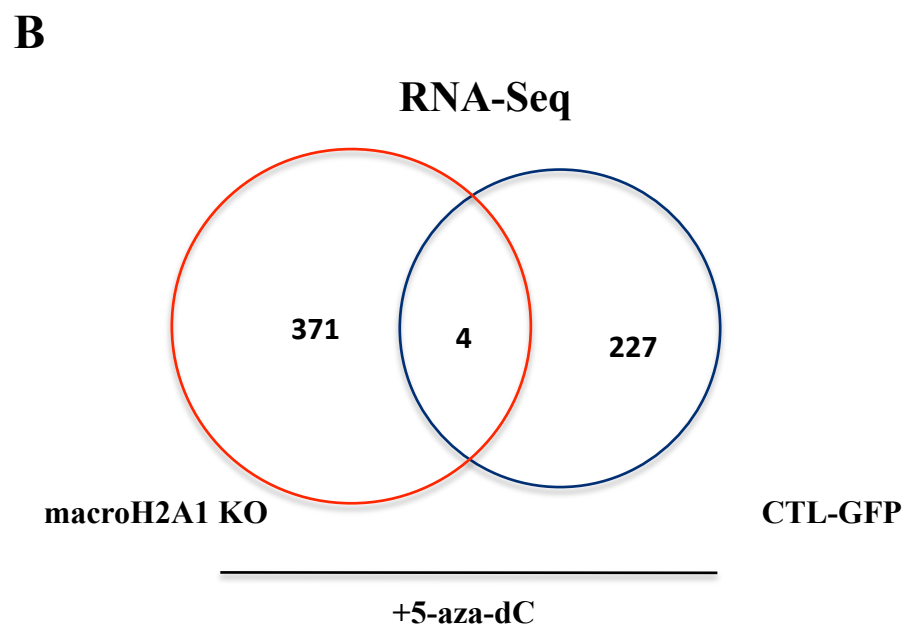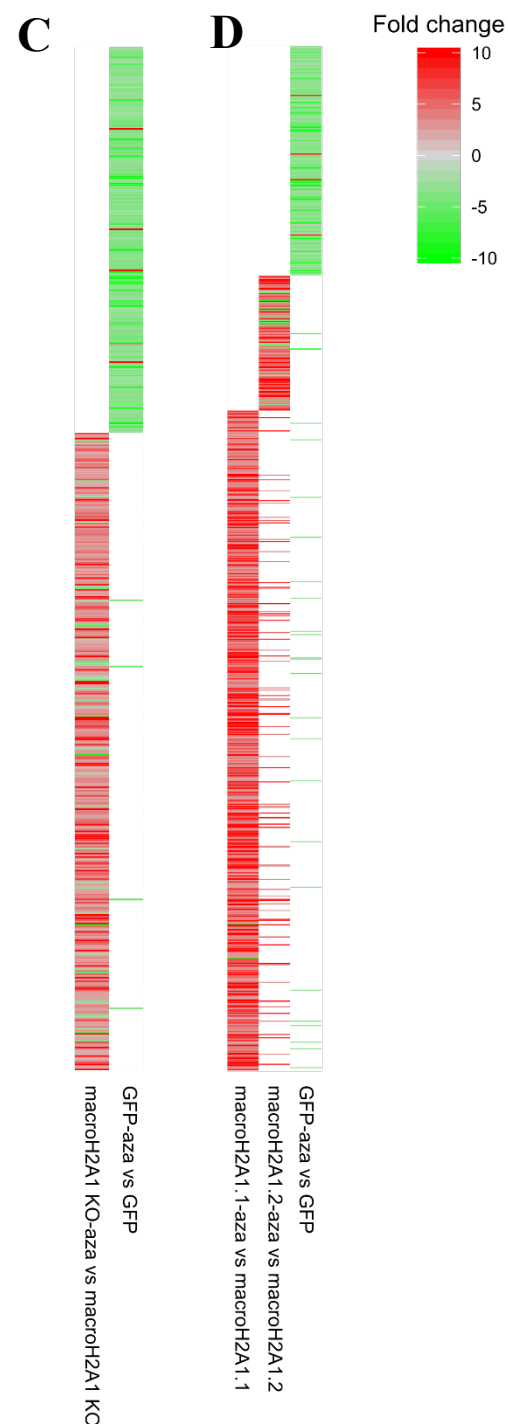

Supplement: NIHMS764409-supplement-Supplemental_Figure_6.pdf [file NIHMS764409-supplement-Supplemental_Figure_6.pdf]

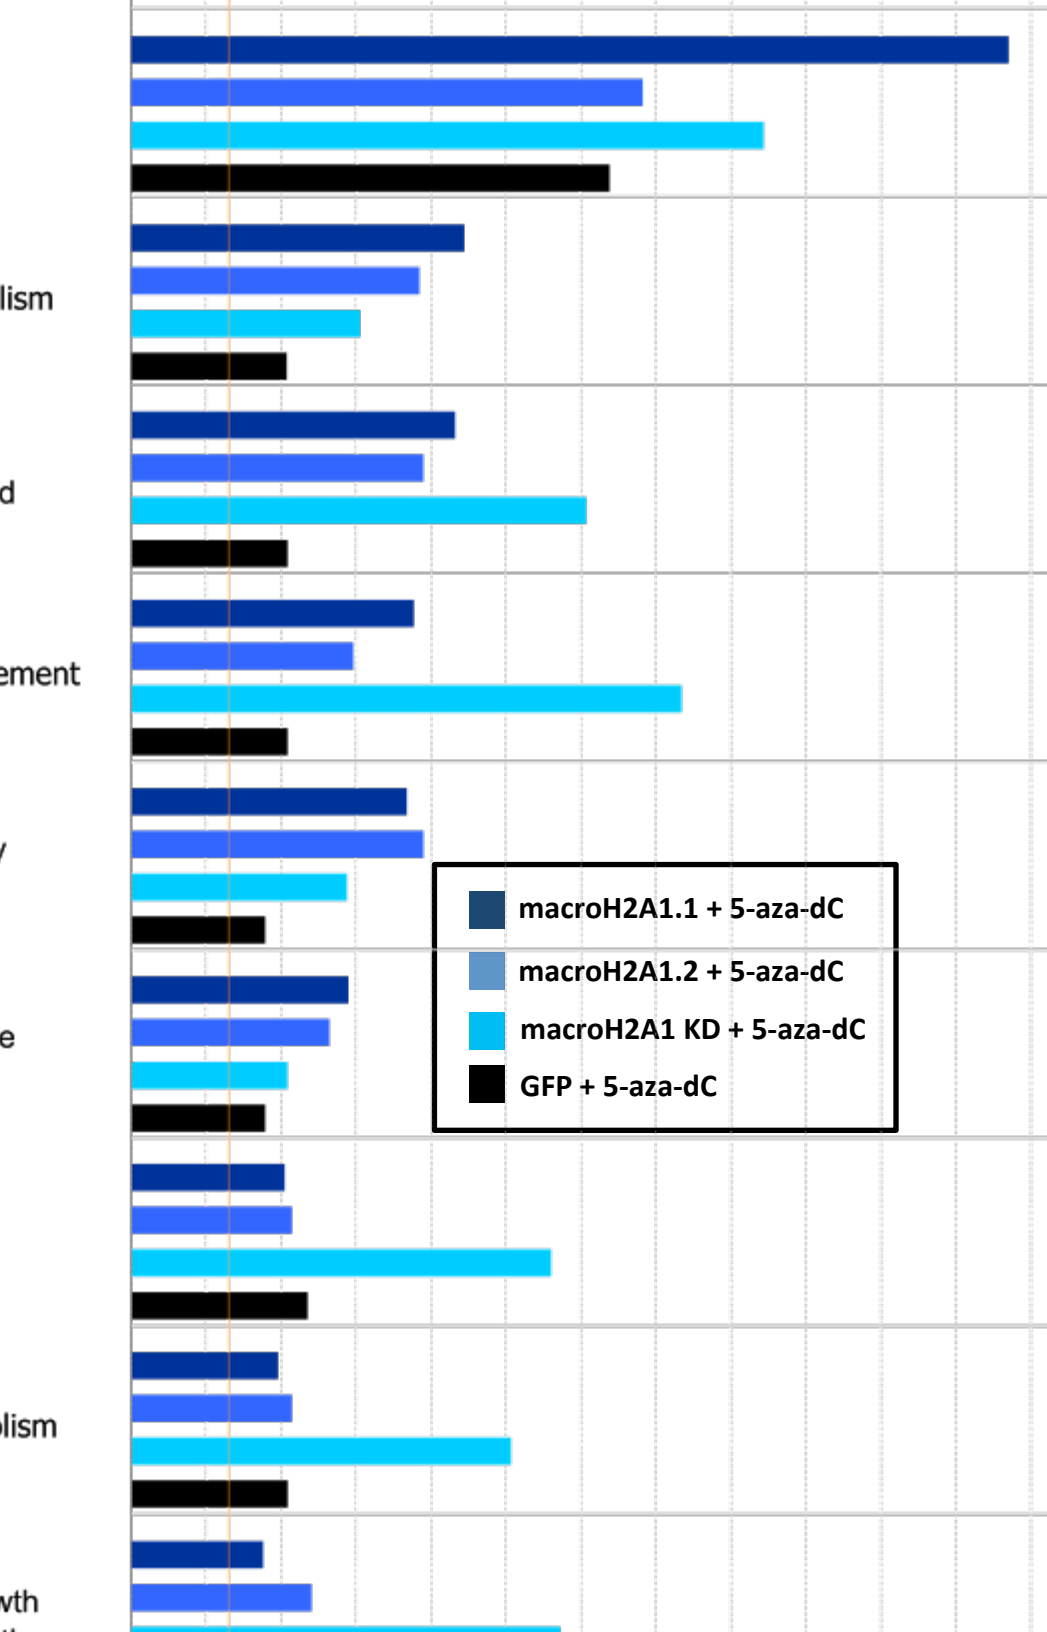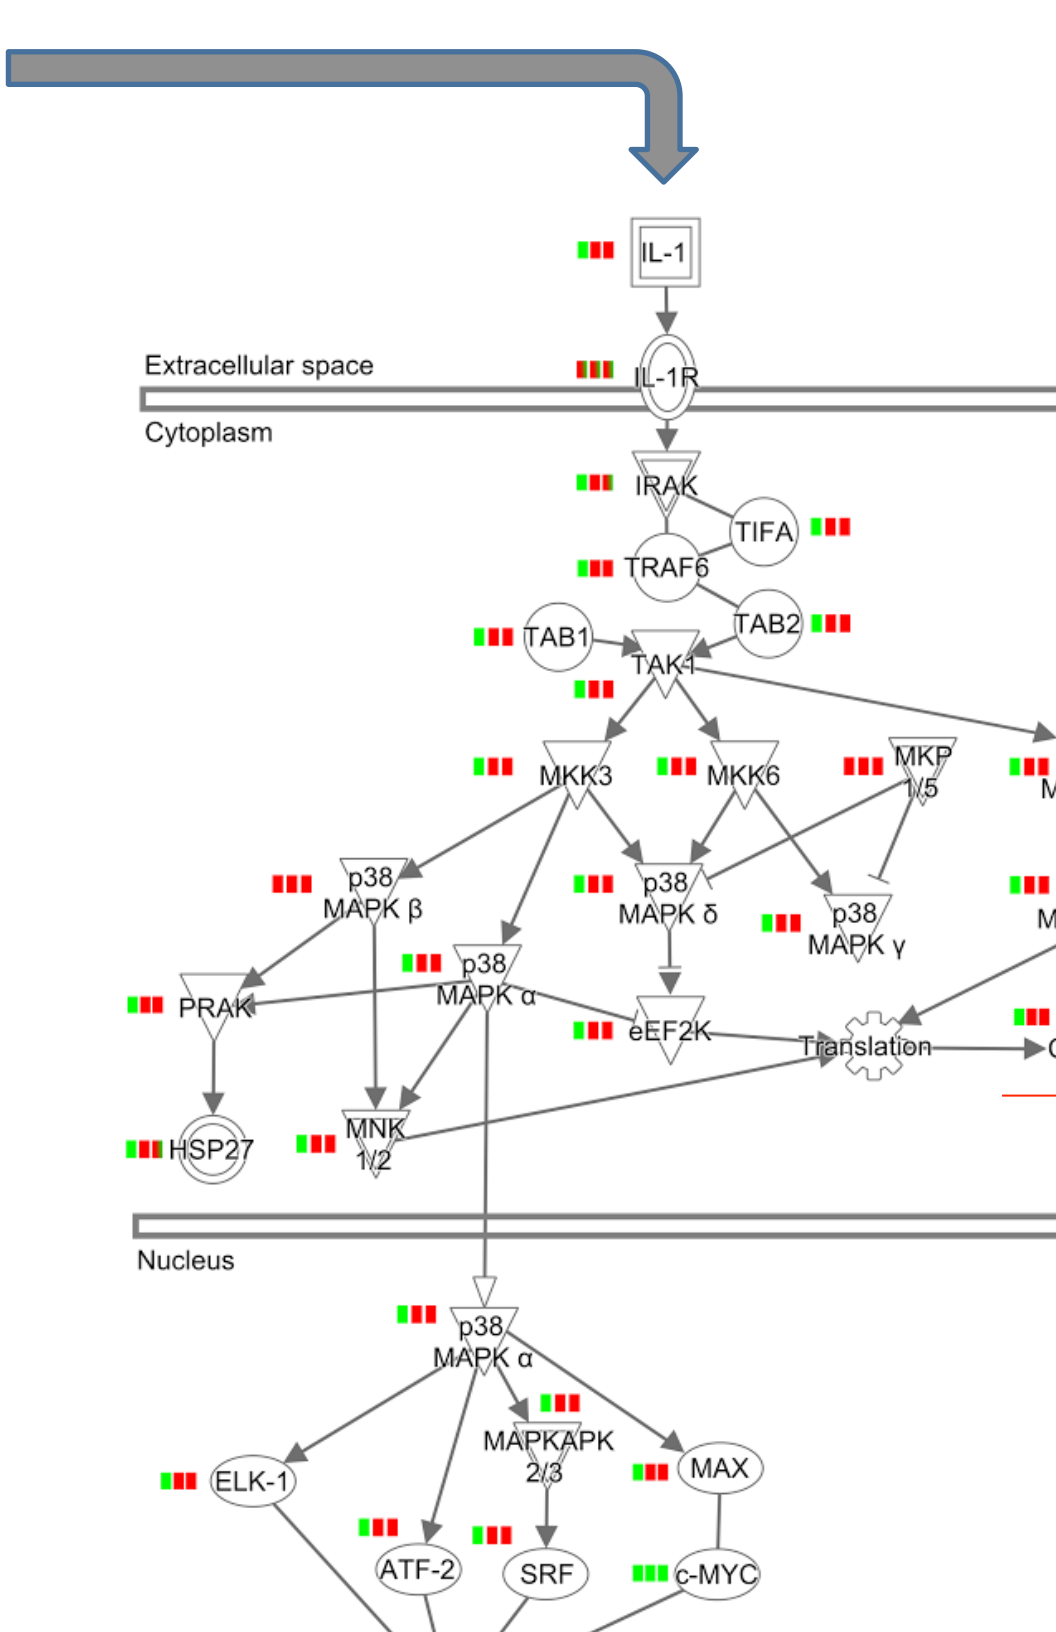

Supplement: NIHMS764409-supplement-Supplemental_Figure_7.pdf [file NIHMS764409-supplement-Supplemental_Figure_7.pdf]

**Figure S8**

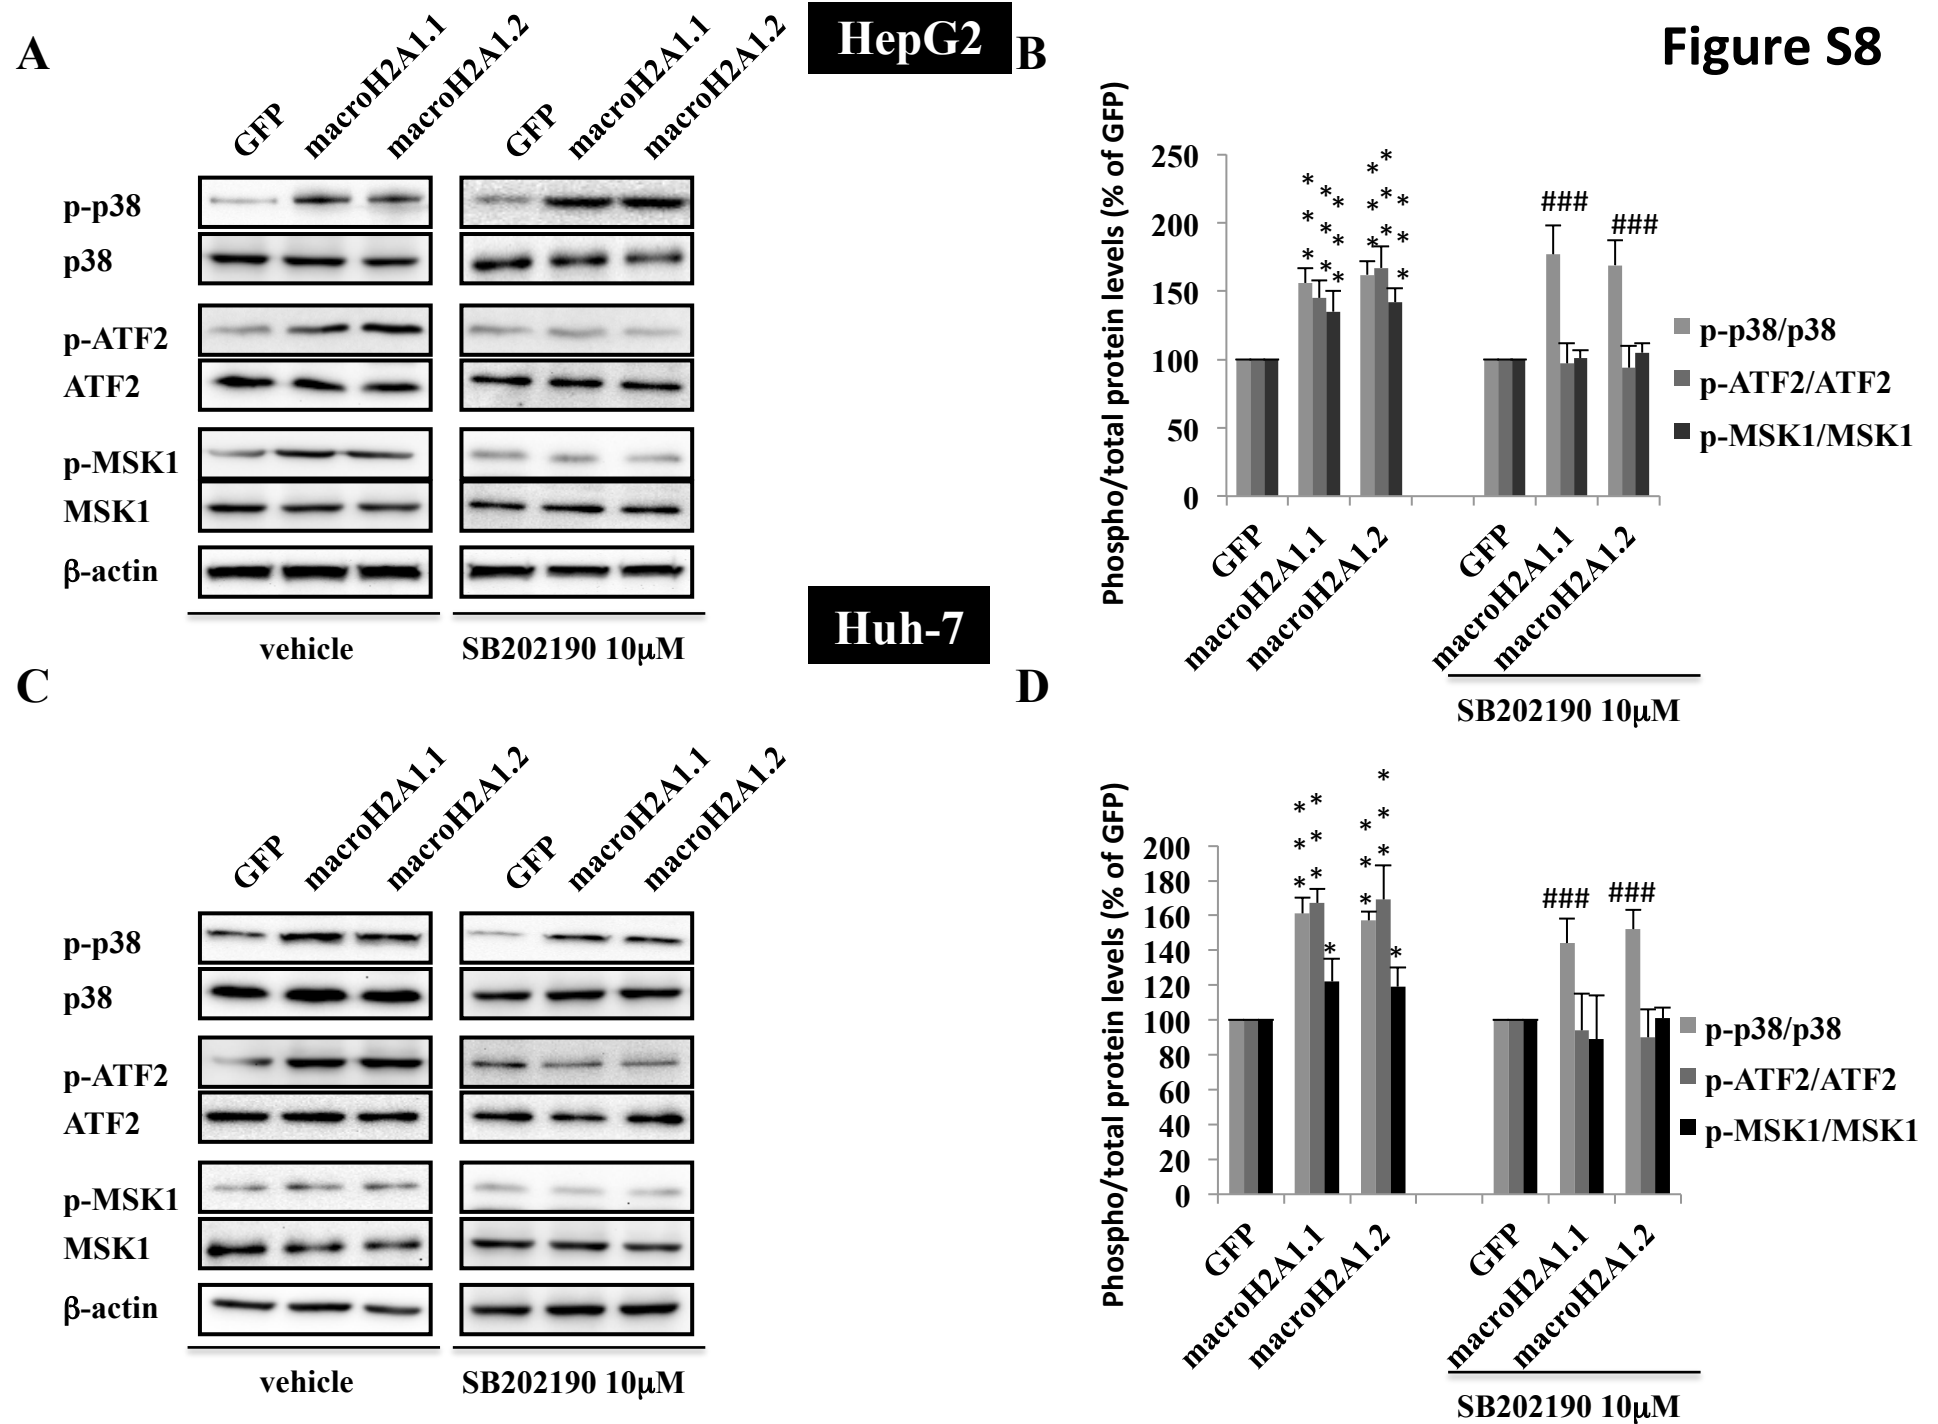

Supplement: NIHMS764409-supplement-Supplemental_Figure_8.pdf [file NIHMS764409-supplement-Supplemental_Figure_8.pdf]

**A****Figure S9**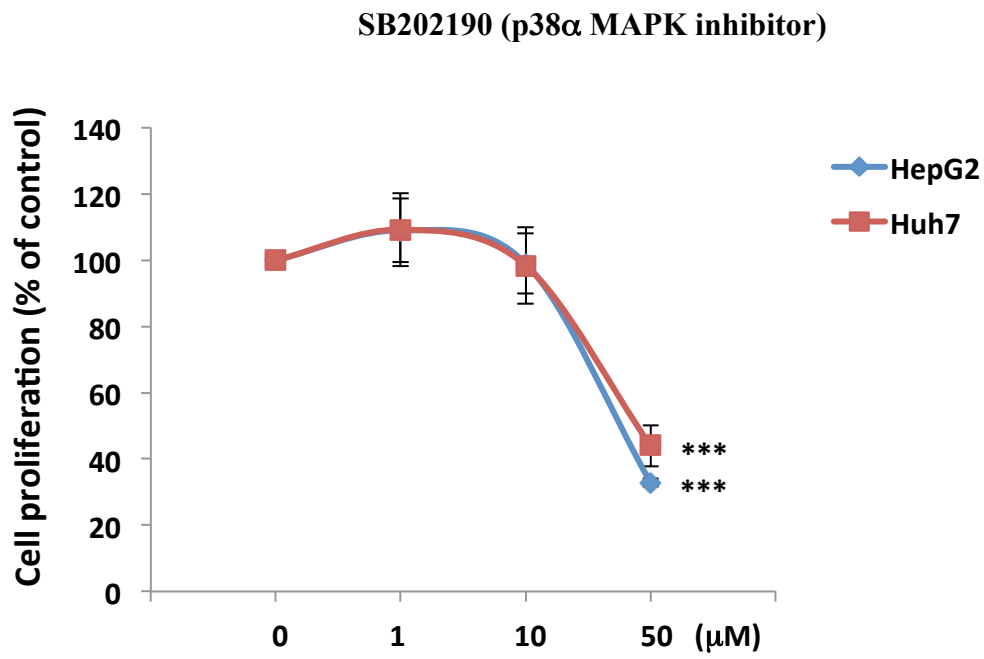**B**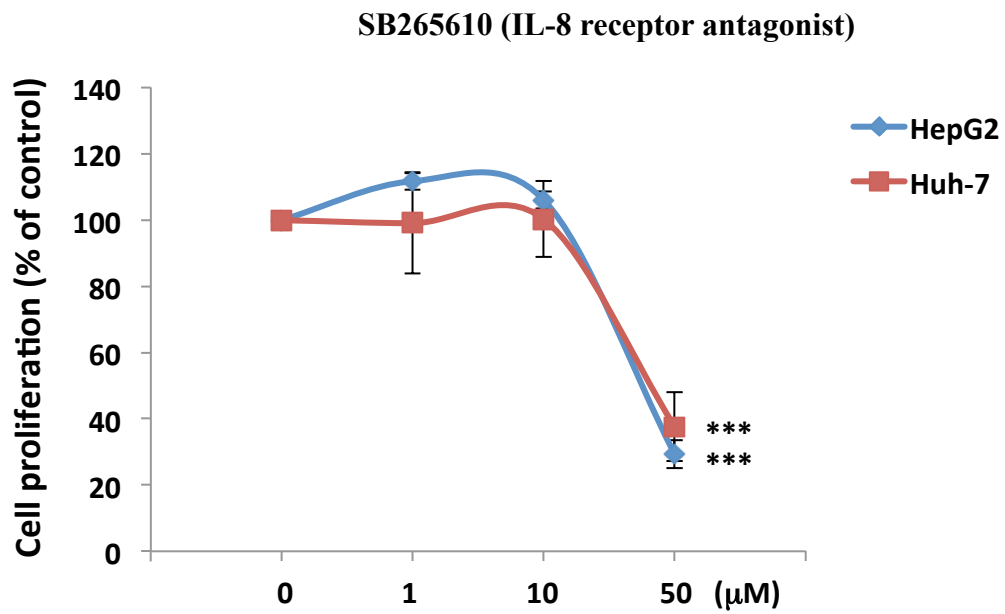

Supplement: NIHMS764409-supplement-Supplemental_Figure_9.pdf [file NIHMS764409-supplement-Supplemental_Figure_9.pdf]
